# Supplementary material
Source: PubMed Central journal article supplement (PMC3902634)

# Supplemental Figure 1

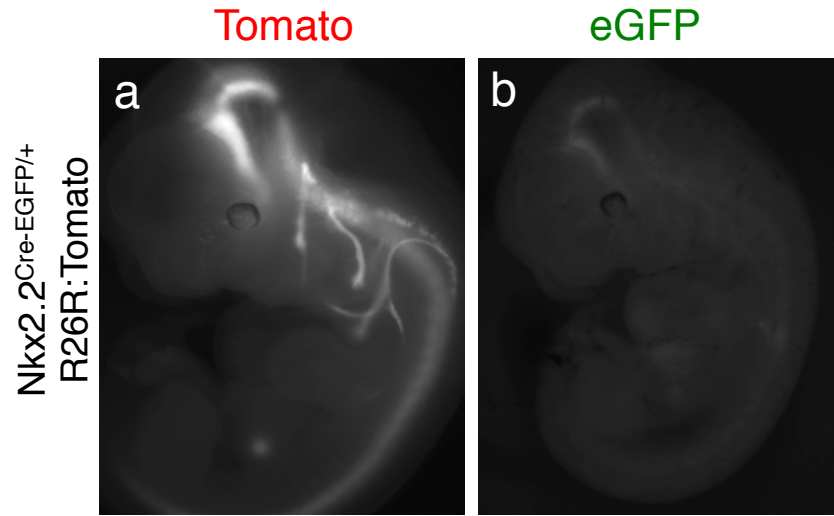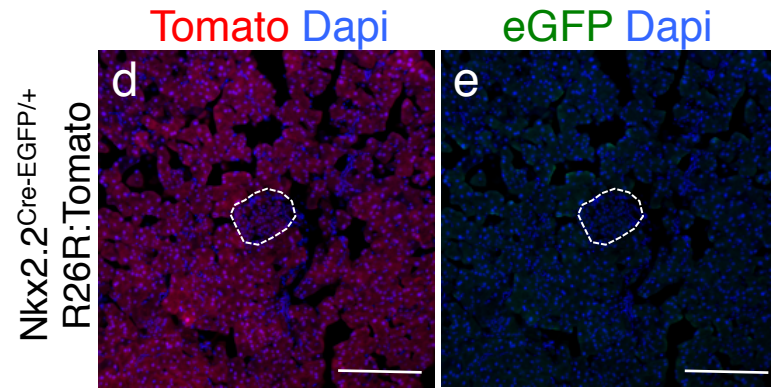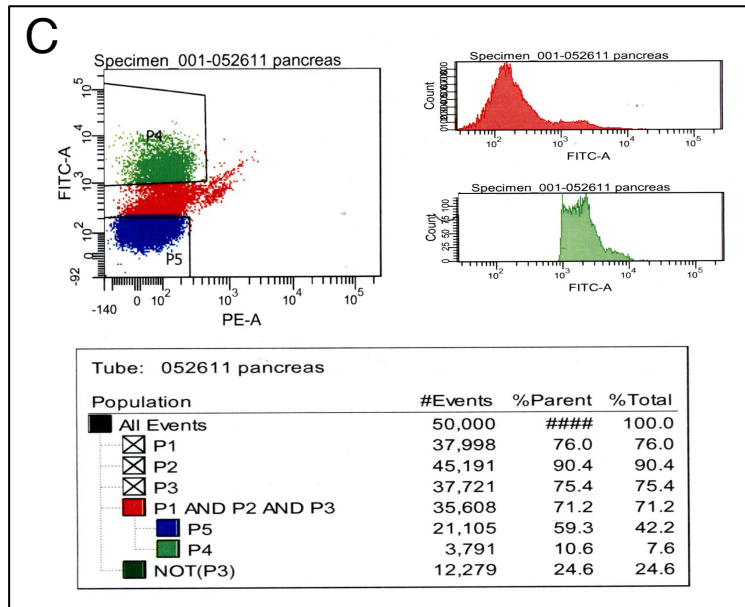

Nkx2.2<sup>Cre-EGFP/+</sup> R26R:Tomato

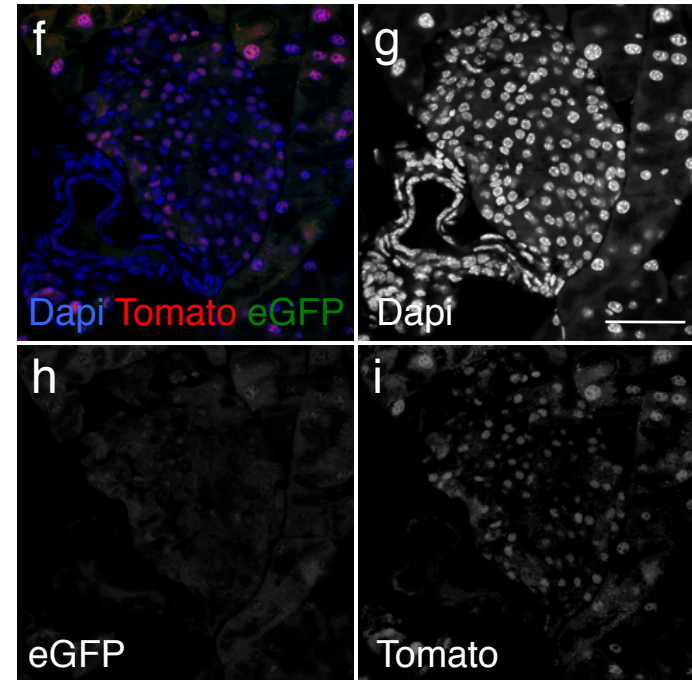

Supplemental Figure 2

Nkx2.2<sup>Cre/+</sup> R26R:Tomato

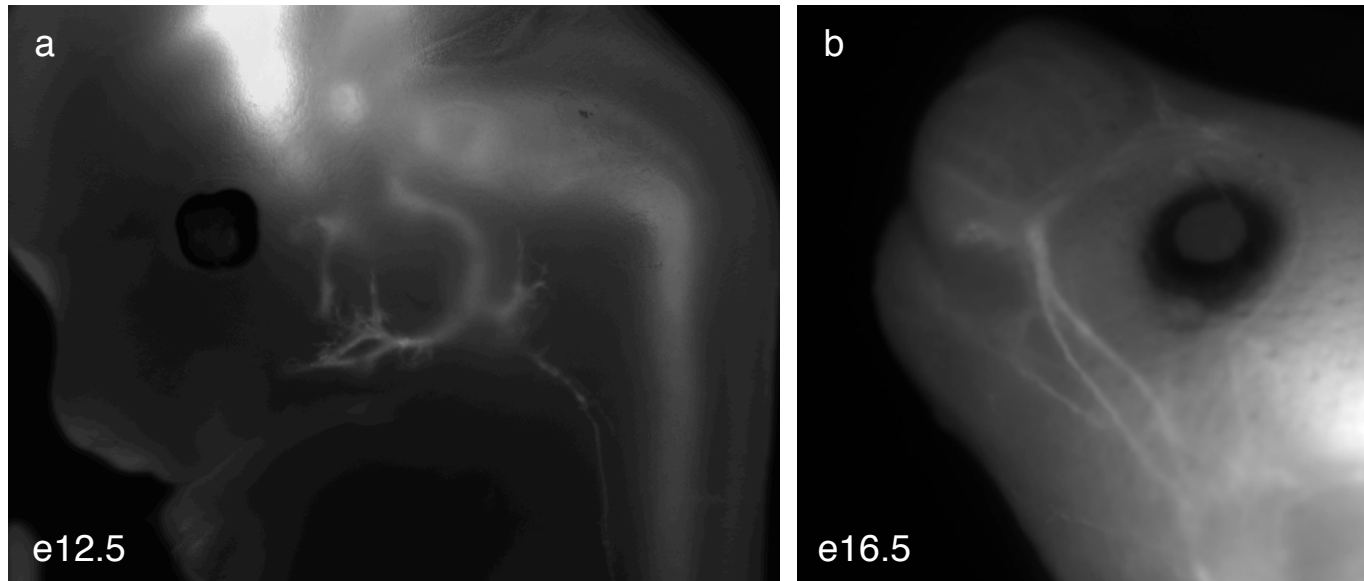

Supplement: NIHMS539394-supplement-Balderes_suppfigures.pdf [file NIHMS539394-supplement-Balderes_suppfigures.pdf]
